# Supplementary figures and images for: African ancestry allelic variation at the MYH9 gene contributes to increased susceptibility to non-diabetic end-stage kidney disease in Hispanic Americans
Source: PubMed Central journal article supplement — Hum Mol Genet. 2010 Feb 9;19(9):1816–27. doi: 10.1093/hmg/ddq040 (PMC2850615; doi:10.1093/hmg/ddq040), 2010-02-09

Supplementary Figure 1

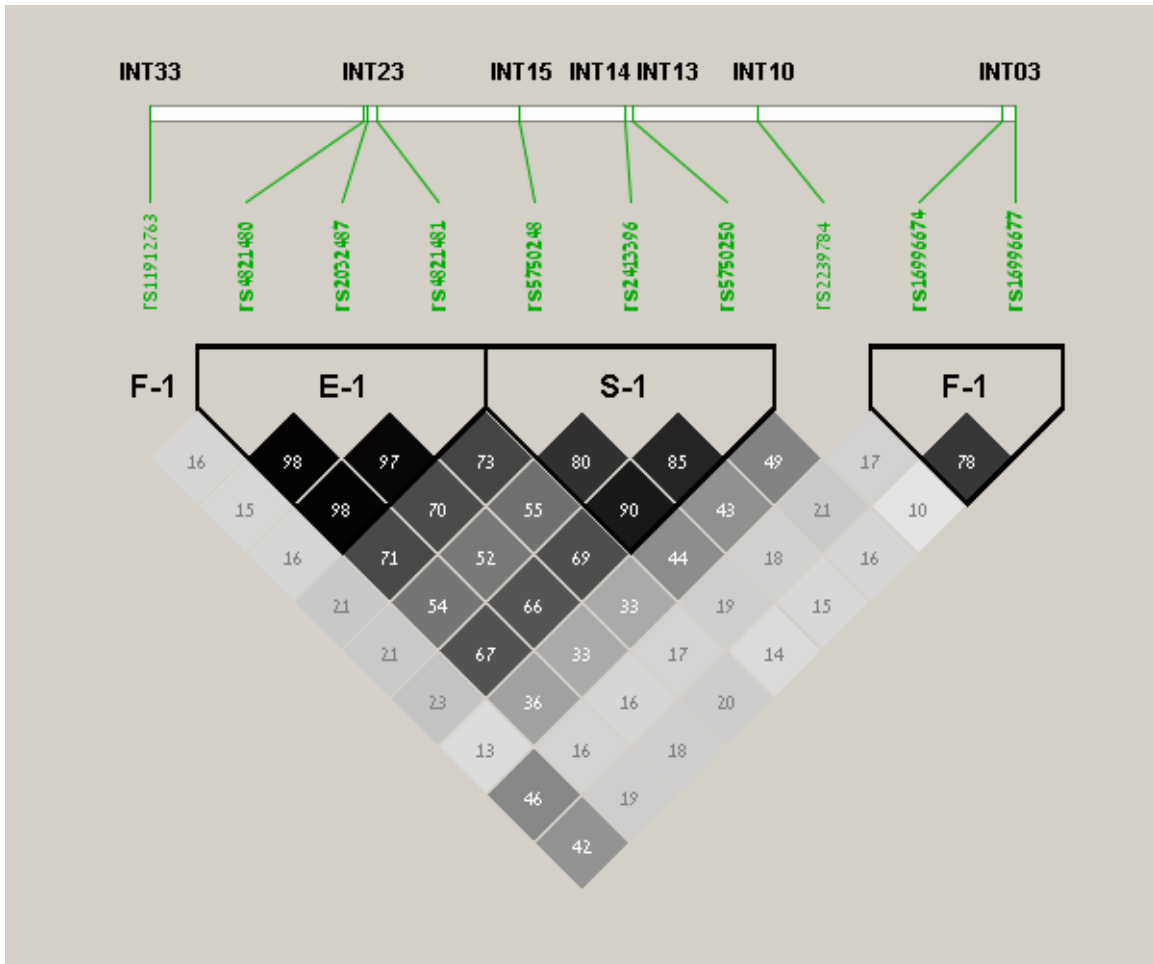

Supplement: ddq040_1.pdf [file ddq040_1.pdf]
